# Supplementary material for: Isoforsythiaside Attenuates Alzheimer’s Disease via Regulating Mitochondrial Function Through the PI3K/AKT Pathway
Source: PubMed Central journal article supplement (PMC7460834; doi:10.3390/ijms21165687), 2020-08-08
Supplement: ijms-21-05687-s001.pdf [file ijms-21-05687-s001.pdf]

# Supplemental Materials

**Table List**

**Table S1** Proteins with significantly different expression levels in proteomics.

| Number                                                             | Gene. names      | Unique. peptides | fc. APP/PS1 - WT | fc. APP/PS1+IFY -APP/PS1 |
|--------------------------------------------------------------------|------------------|------------------|------------------|--------------------------|
| <b>Upregulated proteins by isoforsythiaside (IFY) (Number: 21)</b> |                  |                  |                  |                          |
| 1                                                                  | Fgg              | 2                | 0.41             | 1.99                     |
| 2                                                                  | mKIAA1101; Oxsr1 | 2                | 0.23             | 3.81                     |
| 3                                                                  | Ampd2            | 7                | 0.19             | 4.52                     |
| 4                                                                  | Slc25a23         | 5                | 0.09             | 9.46                     |
| 5                                                                  | Fn3k             | 4                | 0.12             | 7.64                     |
| 6                                                                  | Gmpr             | 4                | 0.16             | 5.83                     |
| 7                                                                  | Jam3             | 4                | 0.12             | 8.25                     |
| 8                                                                  | Kcna6            | 2                | 0.39             | 2.56                     |
| 9                                                                  | Cbx5             | 3                | 0.22             | 5.01                     |
| 10                                                                 | Trappc4          | 3                | 0.26             | 4.20                     |
| 11                                                                 | Emc1             | 7                | 0.19             | 5.91                     |
| 12                                                                 | Crocc            | 4                | 0.13             | 8.59                     |
| 13                                                                 | mCG_6739; Rps21  | 2                | 0.20             | 5.90                     |
| 14                                                                 | Arl8b            | 3                | 0.08             | 15.23                    |
| 15                                                                 | Stk32c           | 4                | 0.22             | 5.50                     |
| 16                                                                 | Ube2i            | 2                | 0.35             | 3.45                     |
| 17                                                                 | Rab9b            | 3                | 0.27             | 4.67                     |
| 18                                                                 | Slc25a10         | 4                | 0.65             | 1.63                     |
| 19                                                                 | Ahnak            | 6                | 0.22             | 6.81                     |
| 20                                                                 | Wdfy1            | 6                | 0.39             | 3.72                     |
| 21                                                                 | Tsr2             | 3                | 0.41             | 4.53                     |
| <b>Downregulated proteins by IFY (Number: 4)</b>                   |                  |                  |                  |                          |
| 1                                                                  | Myh11            | 9                | 1.53             | 0.52                     |
| 2                                                                  | Rpa1             | 2                | 35.80            | 0.03                     |
| 3                                                                  | Mon2             | 5                | 2.41             | 0.60                     |
| 4                                                                  | Tmem109          | 2                | 3.72             | 0.54                     |

fc. APP/PS1-WT: the ratio of protein between saline-treated APP/PS1 mice and WT mice;

fc. APP/PS1+IFY-APP/PS1: the ratio of protein between IFY-treated APP/PS1 mice and saline-treated APP/PS1 mice.

## Figure List

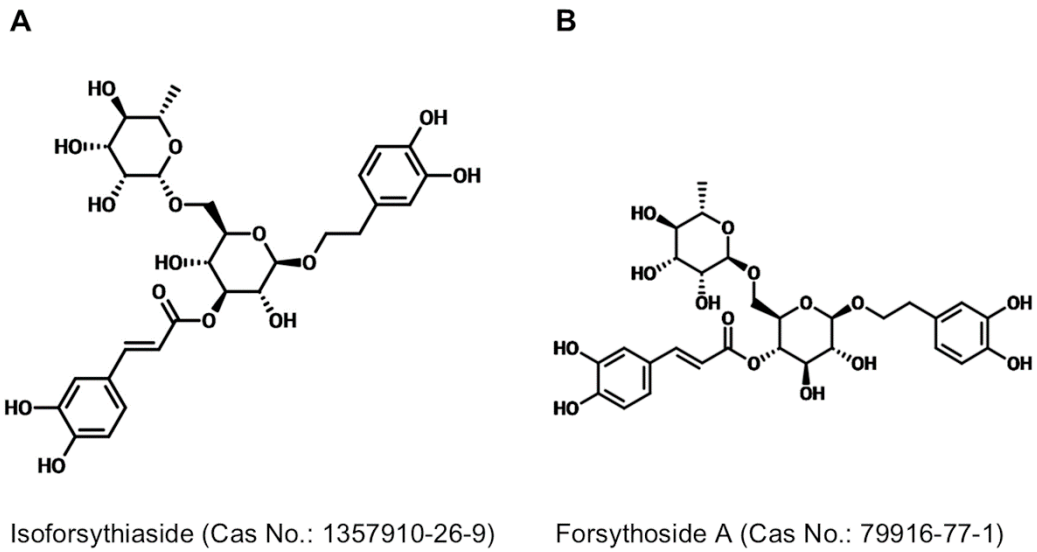

**Figure S1.** Chemical structure of (A) isoforsythiaside (Cas NO.: 1357910-26-9) and (B) forsythoside A (Cas No.: 79916-77-1).

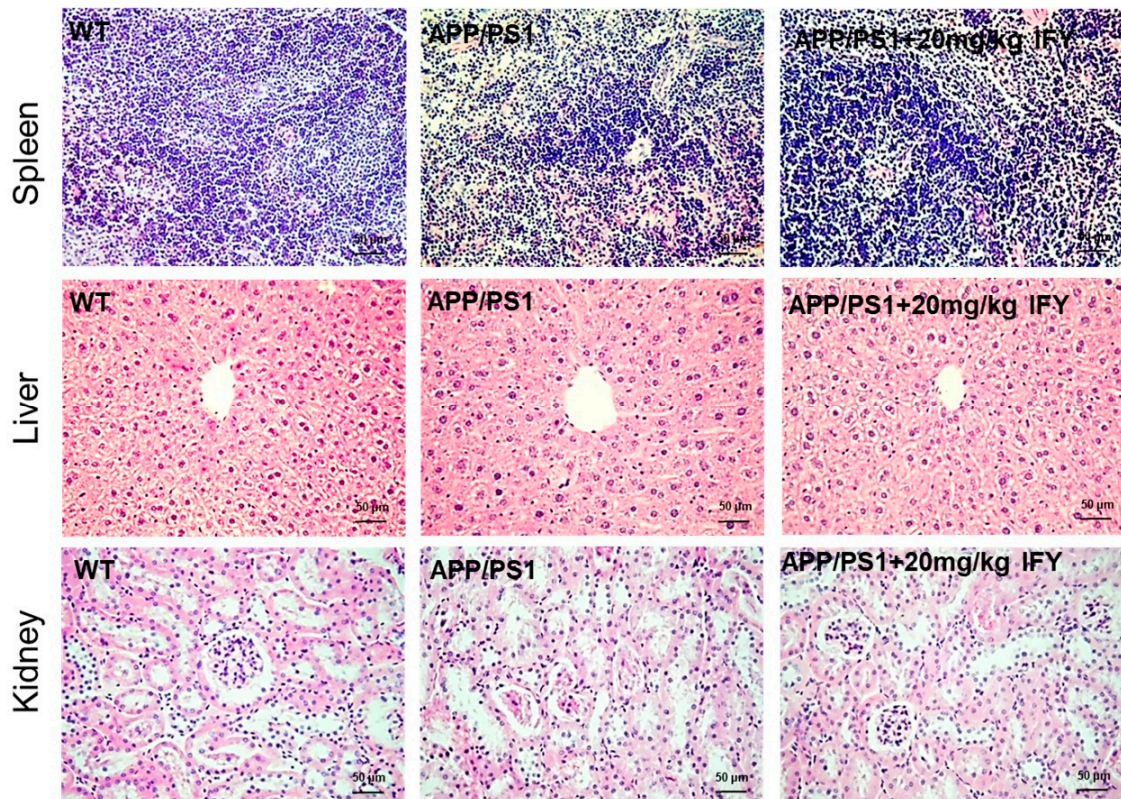

**Figure S2.** H & E staining of spleen, liver and kidney tissues (magnification x 20, scale bar: 50 µm; n=3).

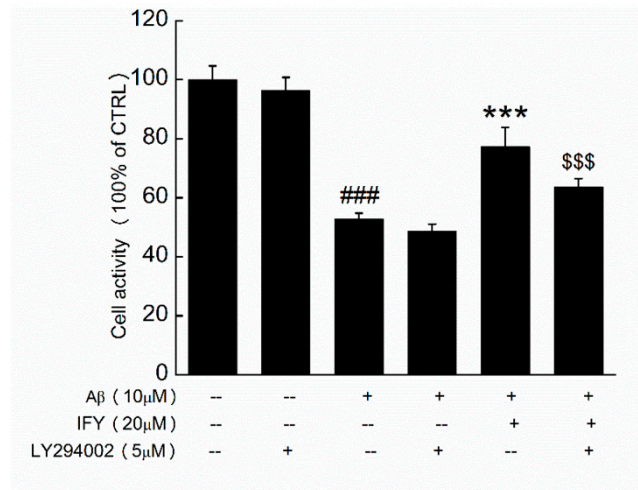

**Figure S3.** Cell viability of U251 cells exposed to Aβ<sub>1-42</sub> and LY294002 tested by MTT (n=6). IFY significantly increased the viability of Aβ<sub>1-42</sub>-treated U251 cells, however, LY294002 blocked down the protective effect of IFY. ###P<0.001 vs. CTRL cells, \*\*\*P<0.001 vs. Aβ<sub>1-42</sub>-exposed U251 cells, \$\$\$P<0.001 vs. IFY and Aβ<sub>1-42</sub>-exposed U251 cells.

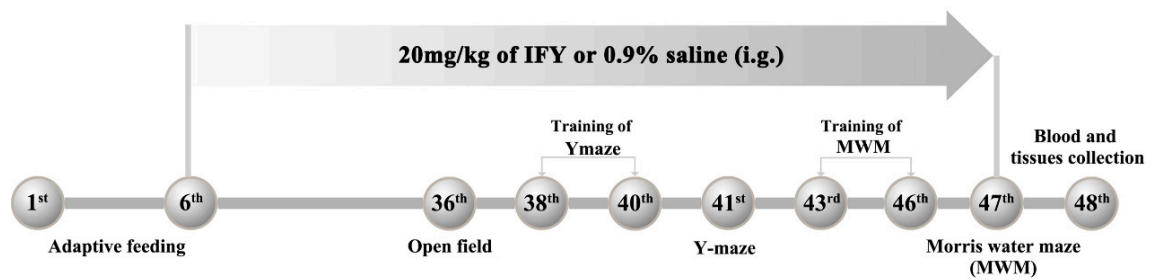

**Figure S4.** Schematic flow chart of animal experiment.
